# Supplementary figures and images for: Metabolomics Study of Different Germplasm Resources for Three Polygonatum Species Using UPLC-Q-TOF-MS/MS
Source: Frontiers journal article supplement (doi:10.3389/fpls.2022.826902), 2022-03-11

S1 Figure The key constituents that identified by MS / MS spectrometry


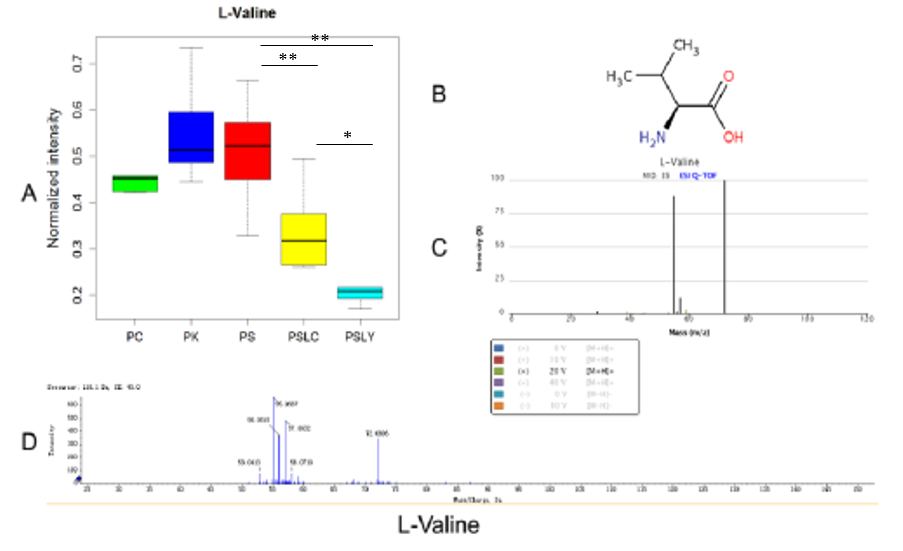

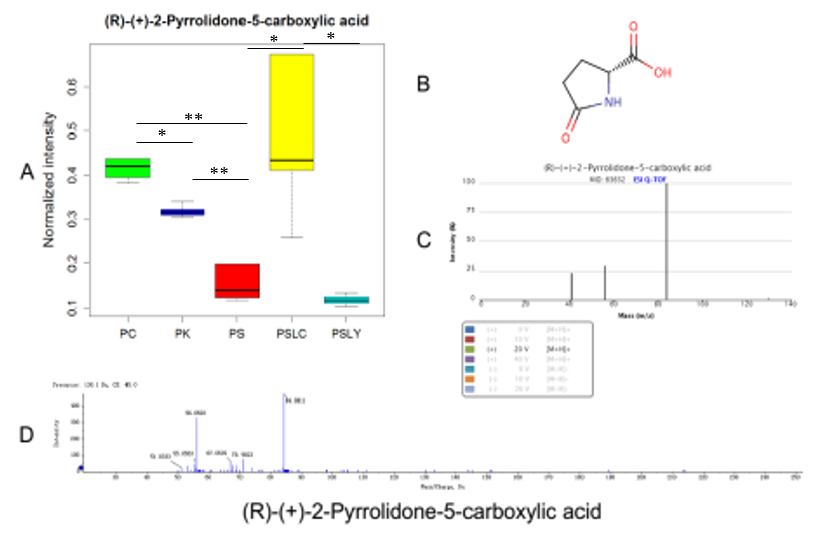


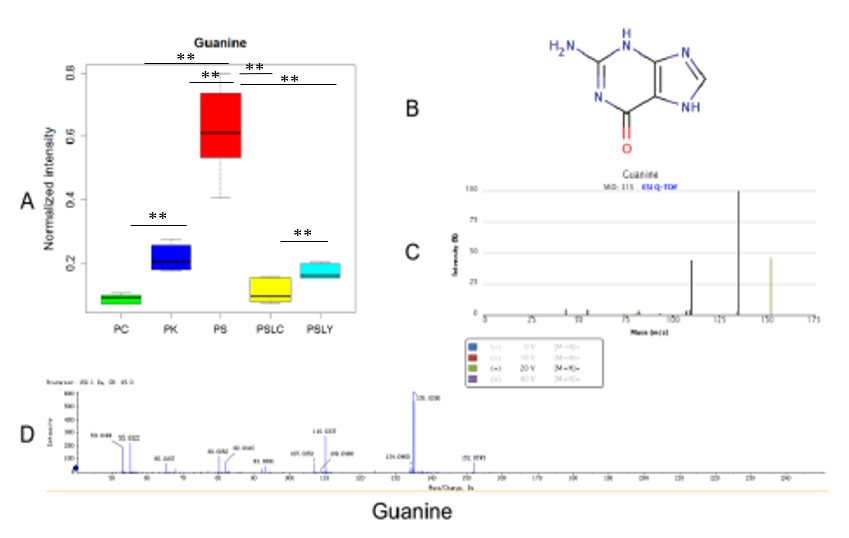

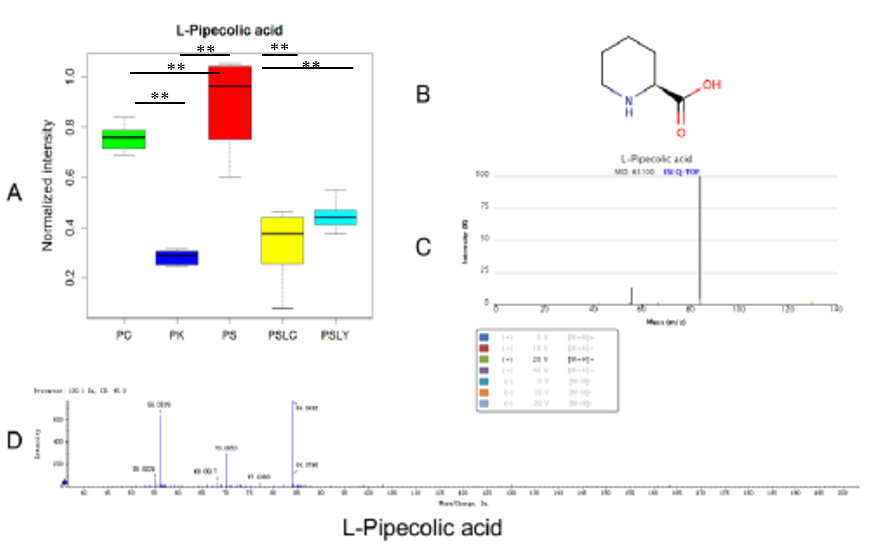


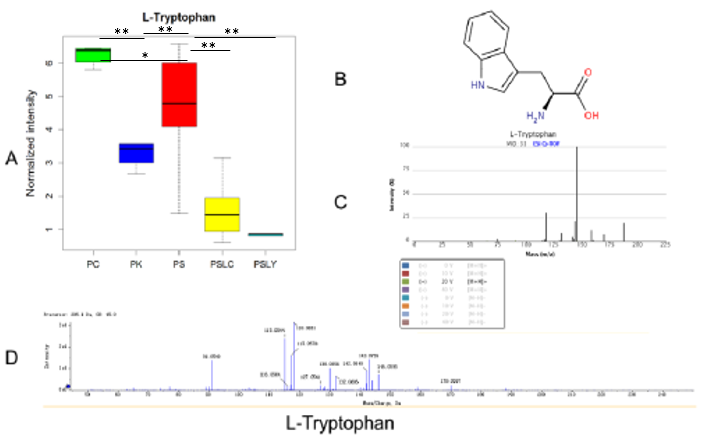

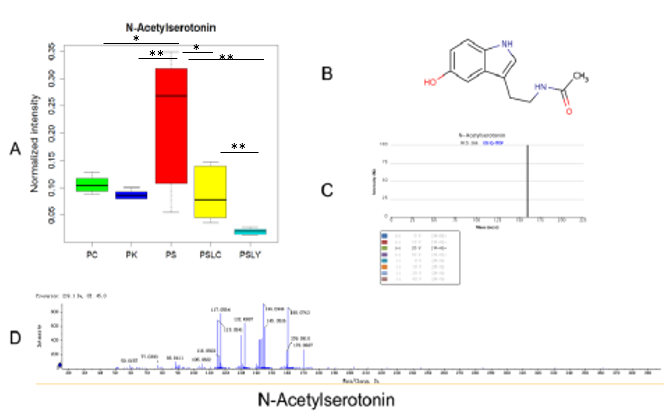


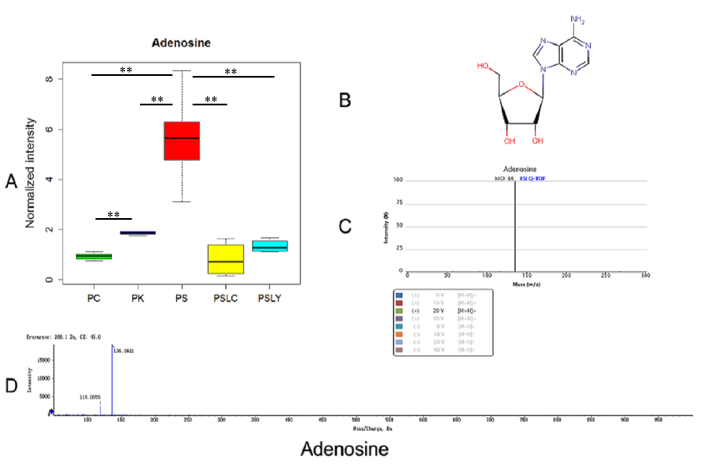

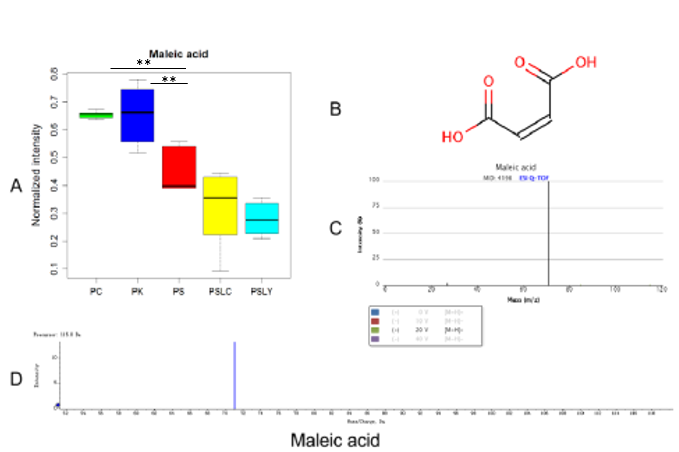


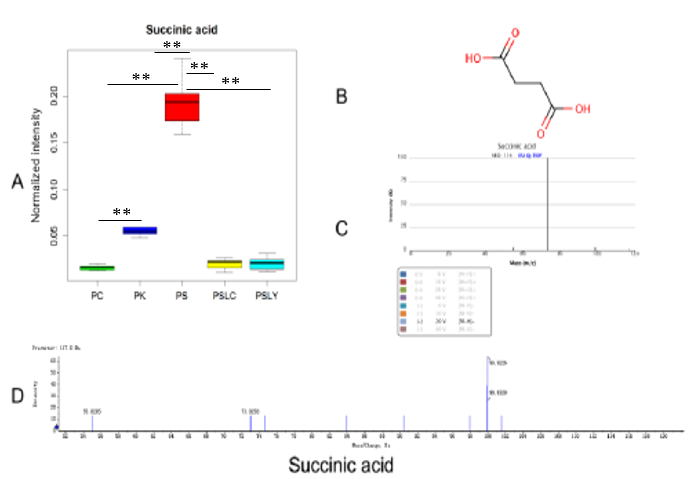

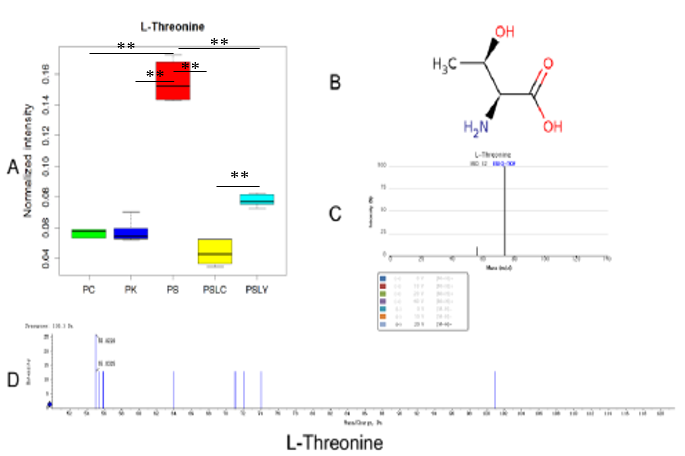


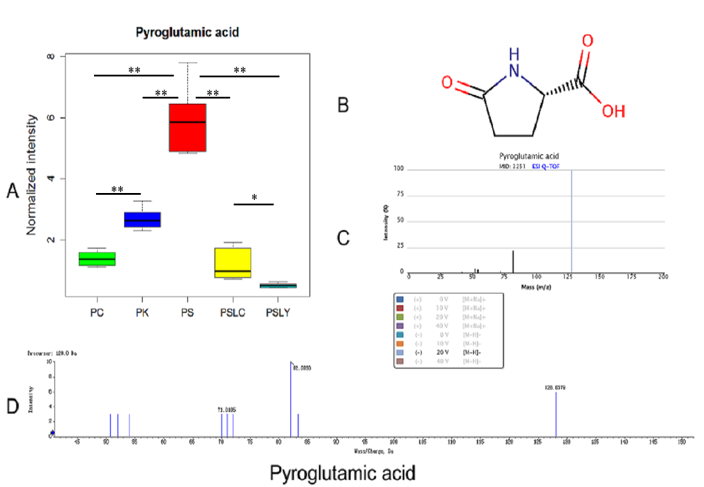

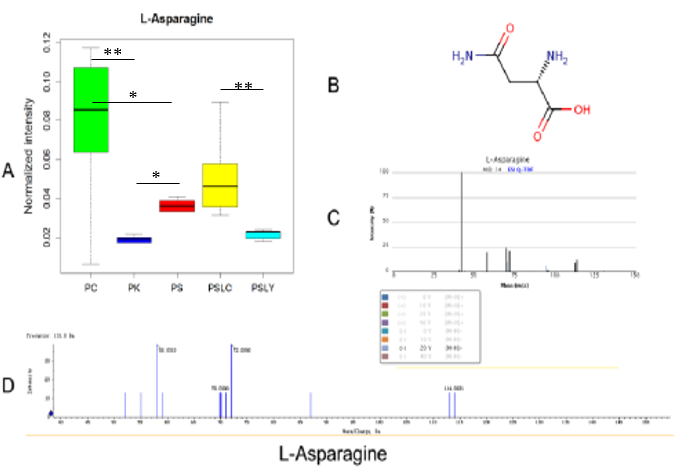


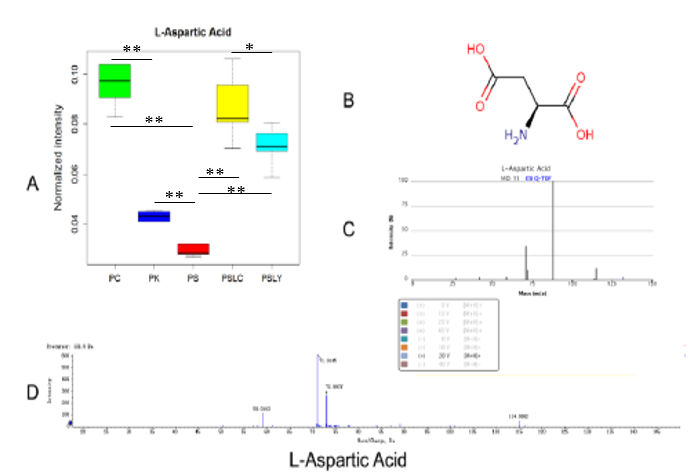

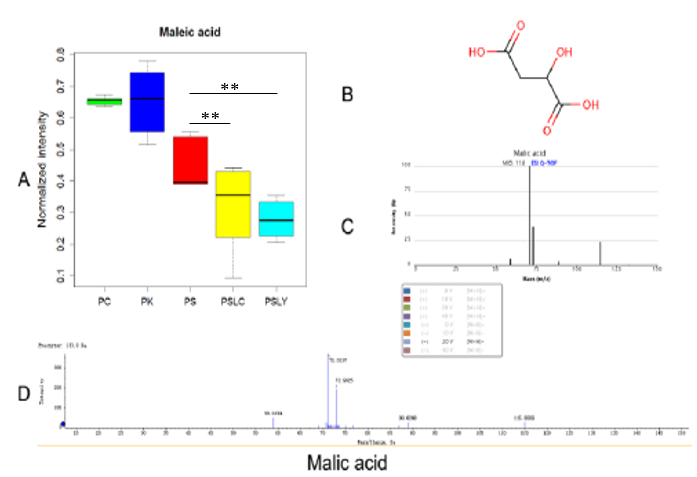


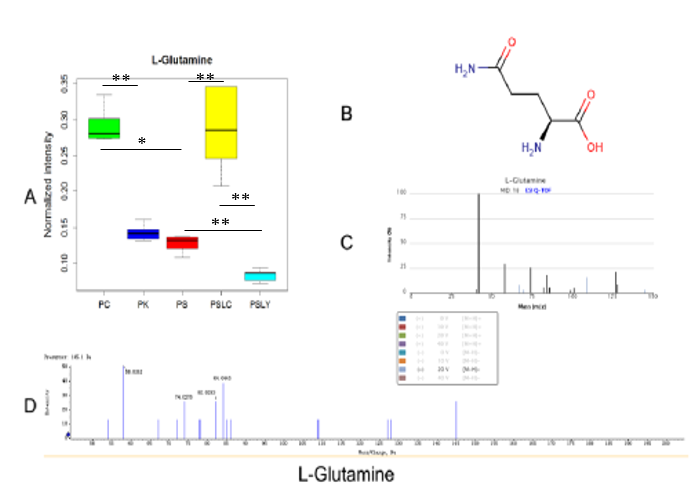

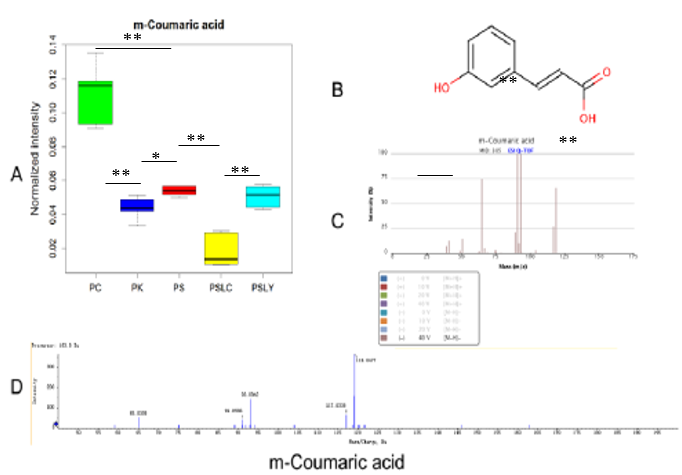


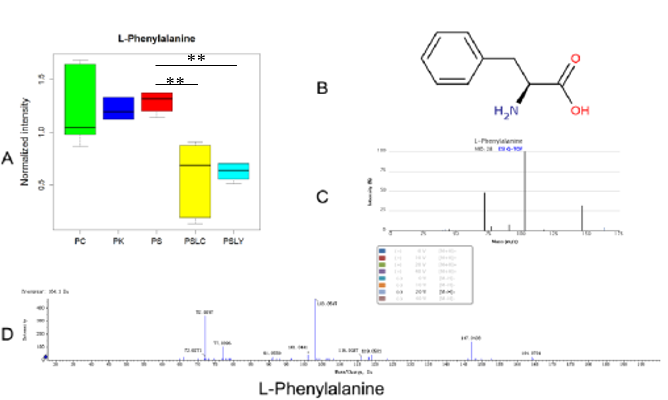

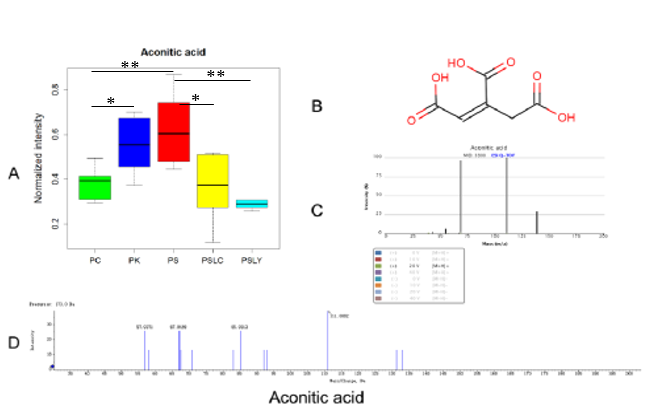


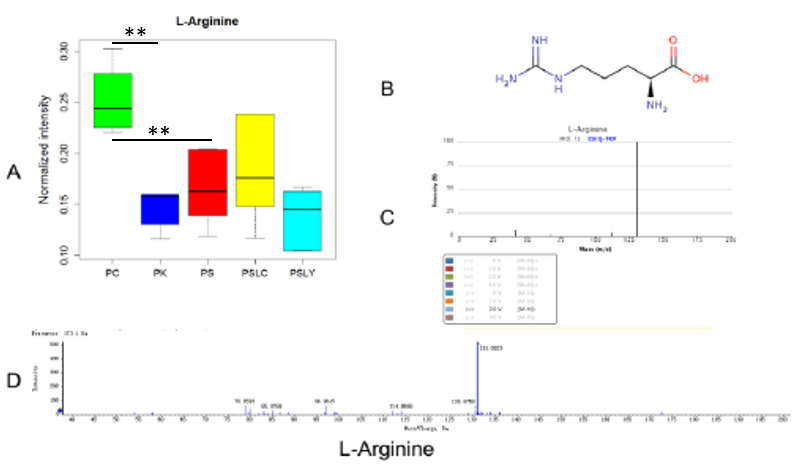

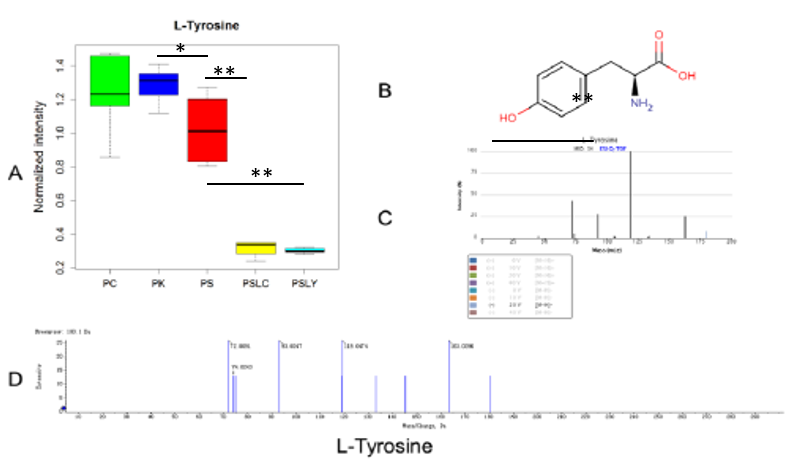


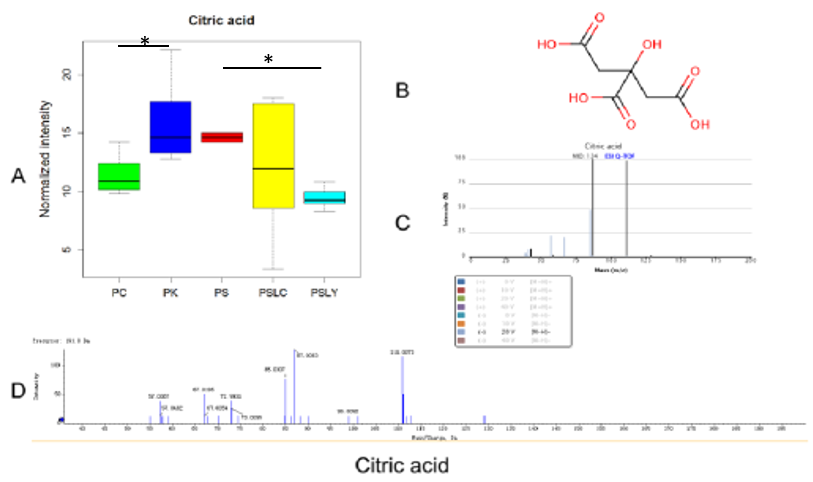

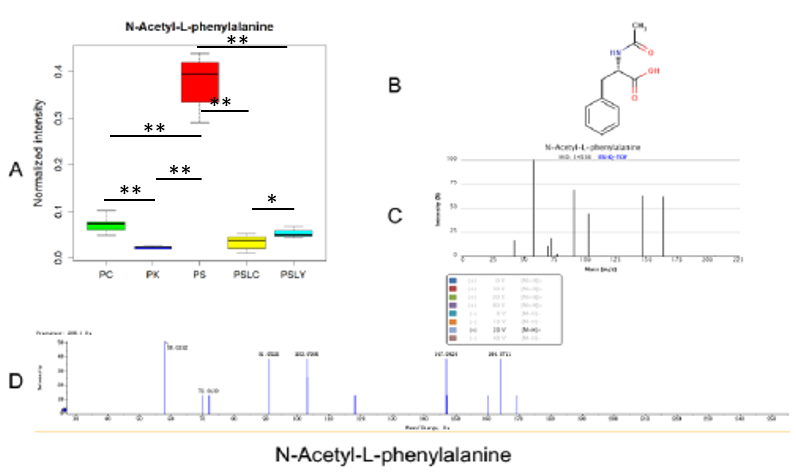


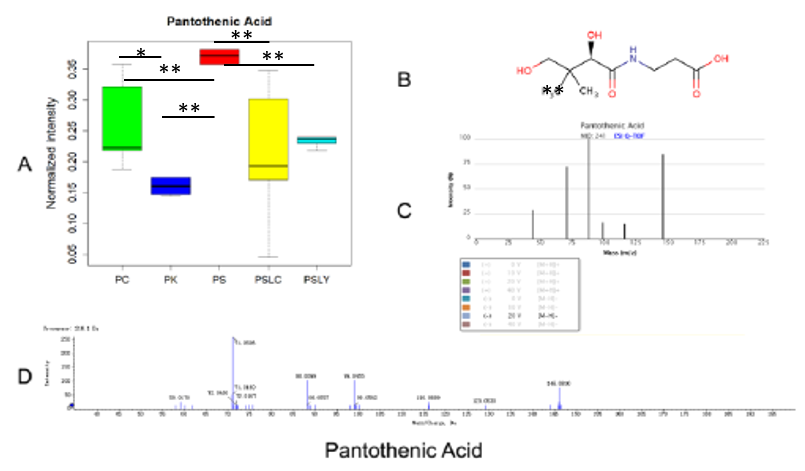

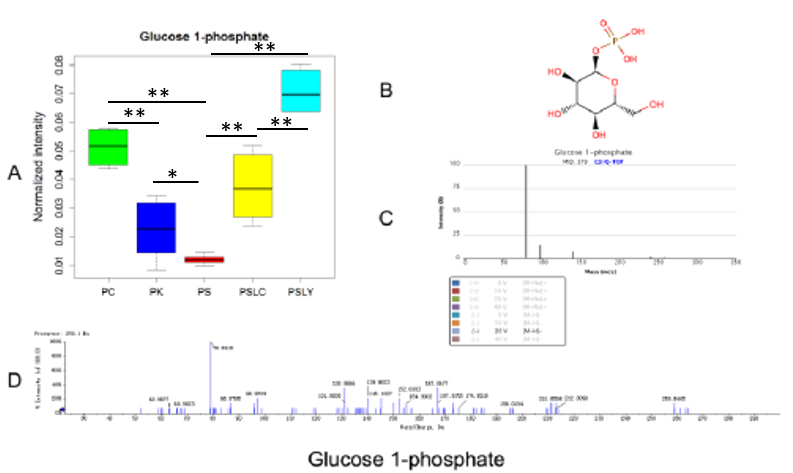


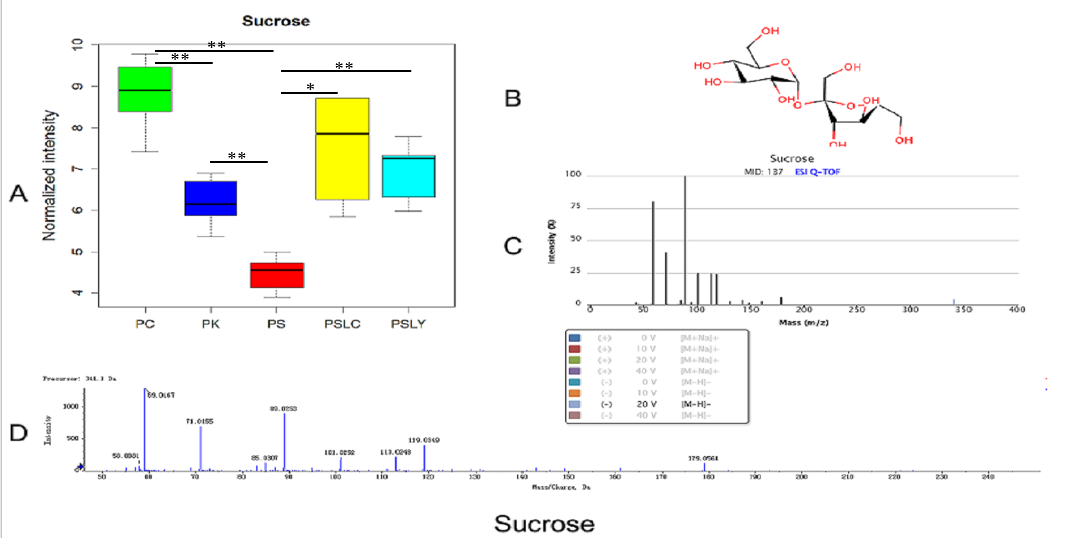

Supplement: Data_Sheet_1.ZIP [file Data_Sheet_1.ZIP]
